# Supplementary material for: Antifouling Systems Based on a Polyhedral Oligomeric Silsesquioxane-Based Hexyl Imidazolium Salt Adsorbed on Copper Nanoparticles Supported on Titania
Source: MDPI journal article supplement (doi:10.3390/nano13071291), 2023-04-06
Supplement: s1 [file s1]

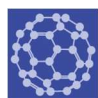

## Article

# Antifouling Systems Based on a Polyhedral Oligomeric Silsesquioxane-Based Hexyl Imidazolium Salt Adsorbed on Copper Nanoparticles Supported on Titania

Alessandro Presentato <sup>1</sup>, Eleonora La Greca <sup>2</sup>, Luca Consentino <sup>1,2</sup>, Rosa Alduina <sup>1</sup>, Leonarda Francesca Liotta <sup>2,\*</sup> and Michelangelo Gruttadauria <sup>1,\*</sup>

<sup>1</sup> Dipartimento di Scienze e Tecnologie Biologiche, Chimiche e Farmaceutiche, Viale Delle Scienze, Edificio 17, I-90128 Palermo, Italy; alessandro.presentato@unipa.it (A.P.); luca.consentino@ismn.cnr.it (L.C.); valeria.alduina@unipa.it (R.A.)

<sup>2</sup> Istituto per lo Studio dei Materiali Nanostrutturati (ISMN)-CNR, Via Ugo La Malfa 153, I-90146 Palermo, Italy; eleonora.lagreca@ismn.cnr.it

\* Correspondence: leonardafrancesca.liotta@cnr.it (L.F.L.); michelangelo.gruttadauria@unipa.it (M.G.)

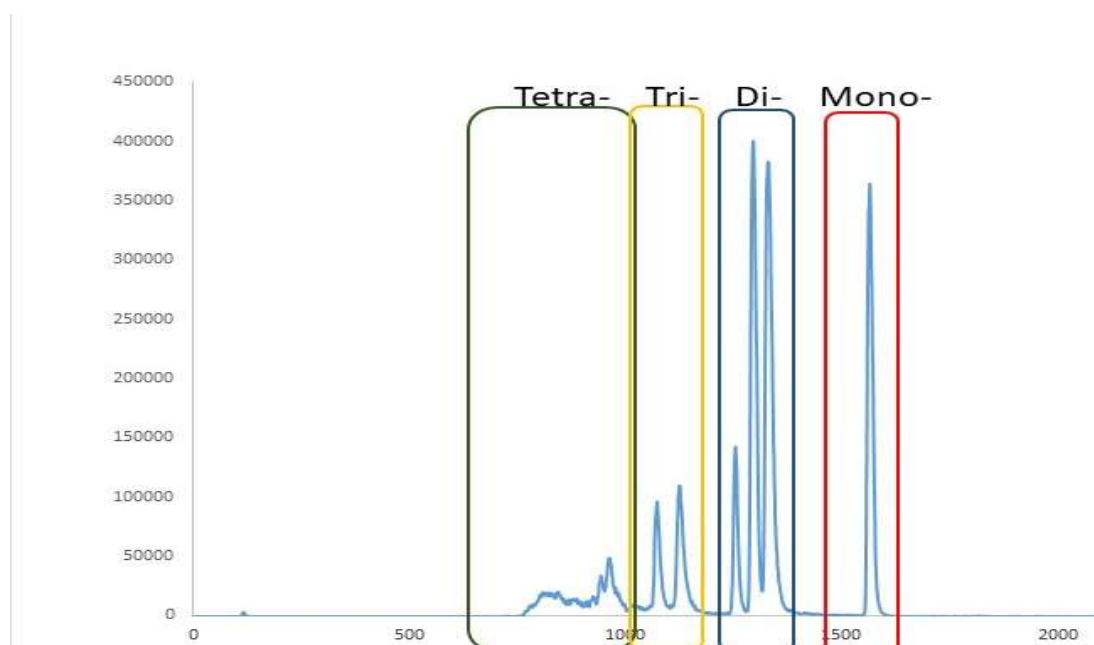

**Figure S1.** HPLC/MS analysis of HQ-POSS.

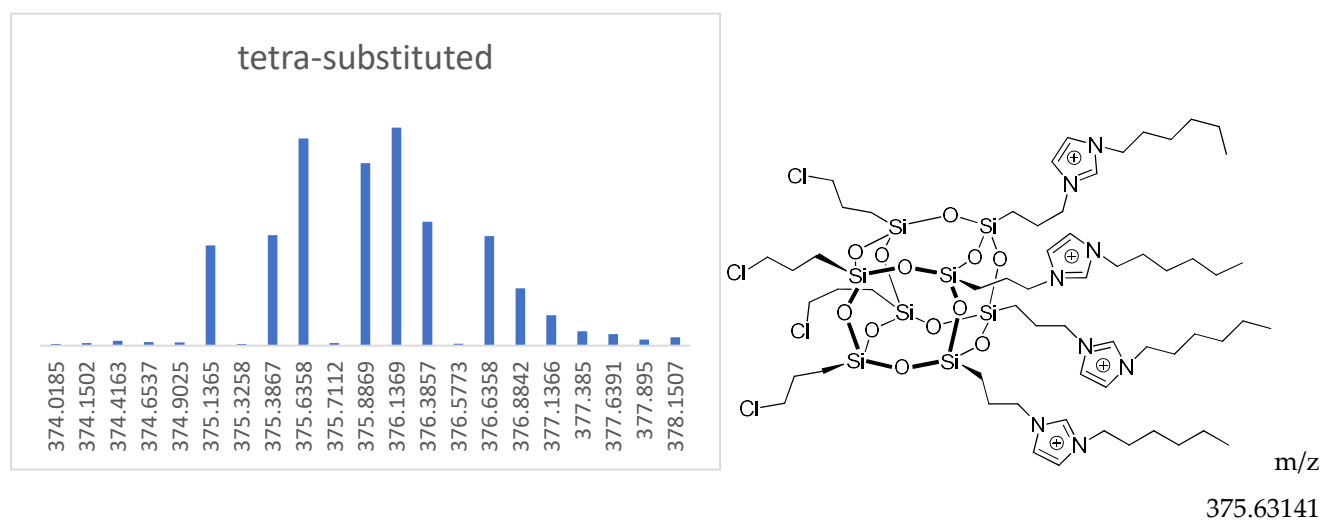

Figure S2. Mass spectrum of tetra-substituted HQ-POSS.

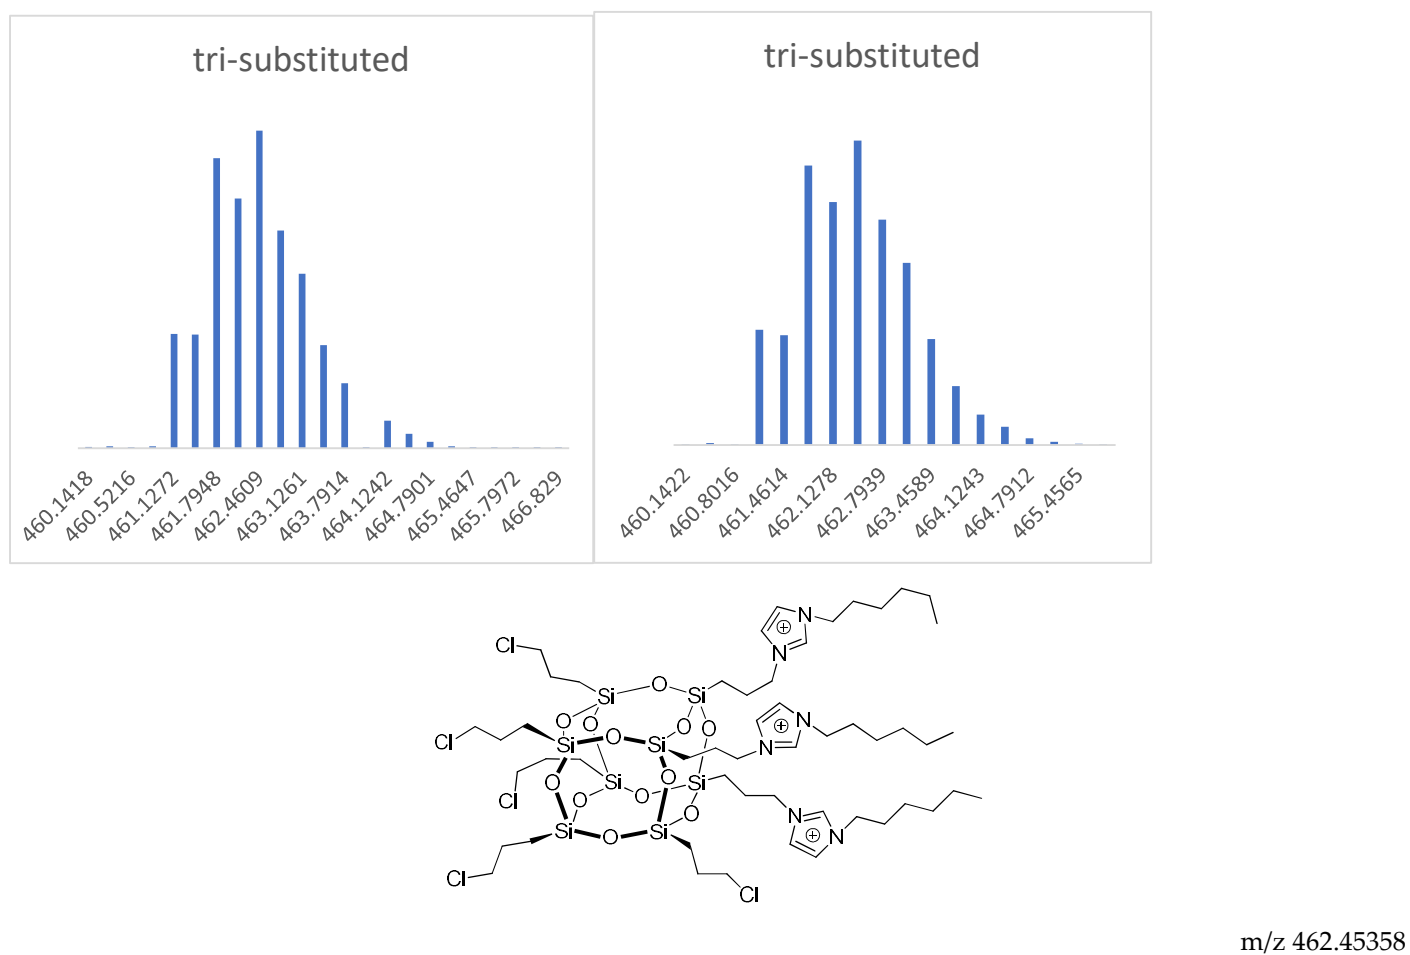

Figure S3. Mass spectra of tri-substituted HQ-POSS.

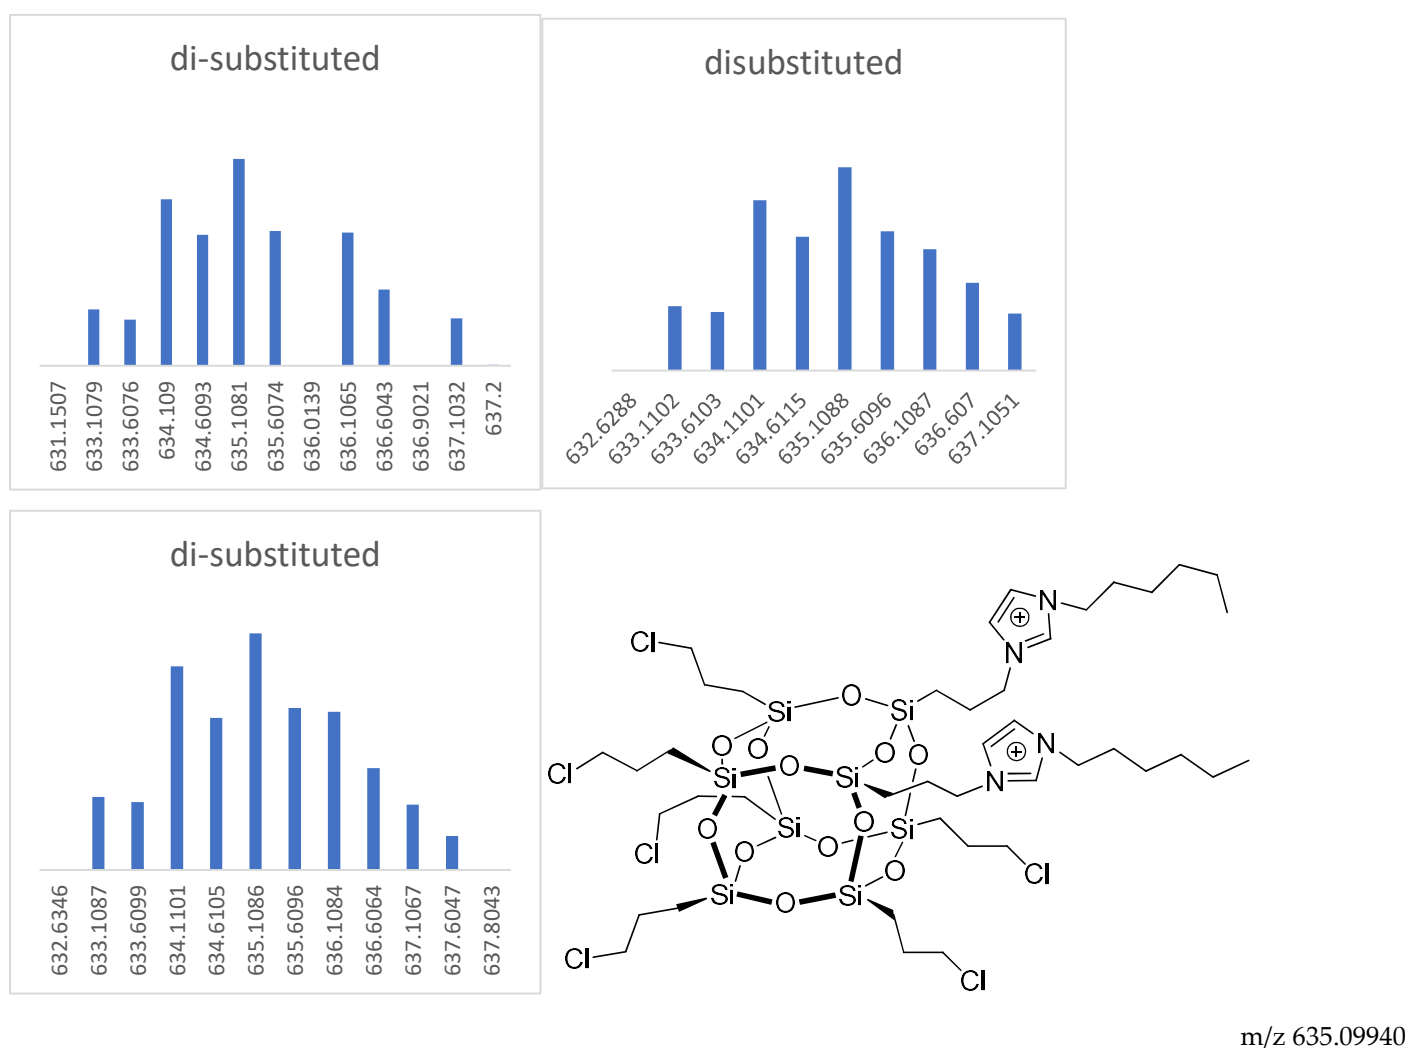

Figure S4. Mass spectra of di-substituted HQ-POSS.

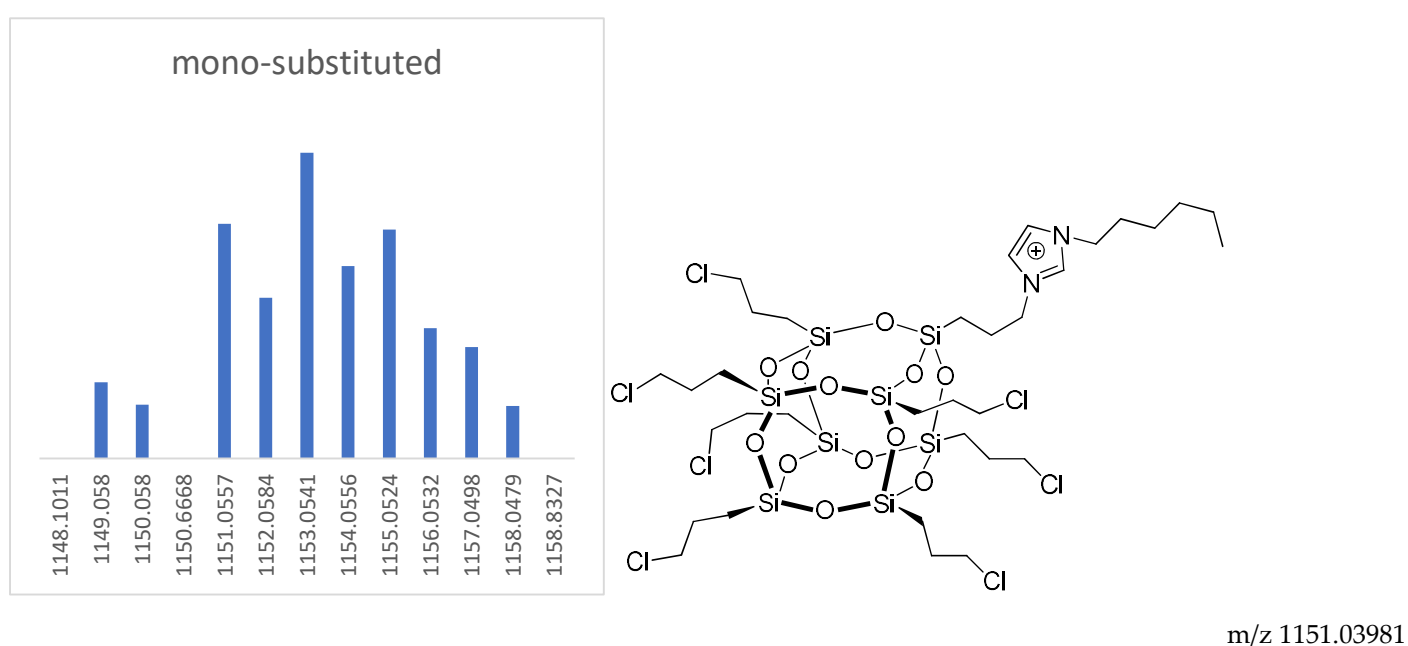

Figure S5. Mass spectrum of mono-substituted HQ-POSS.

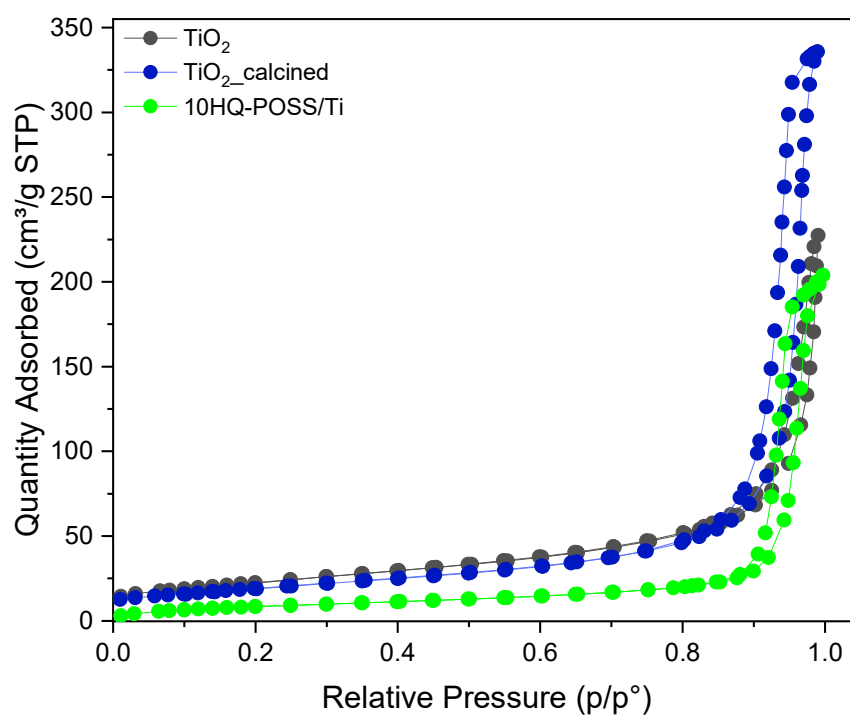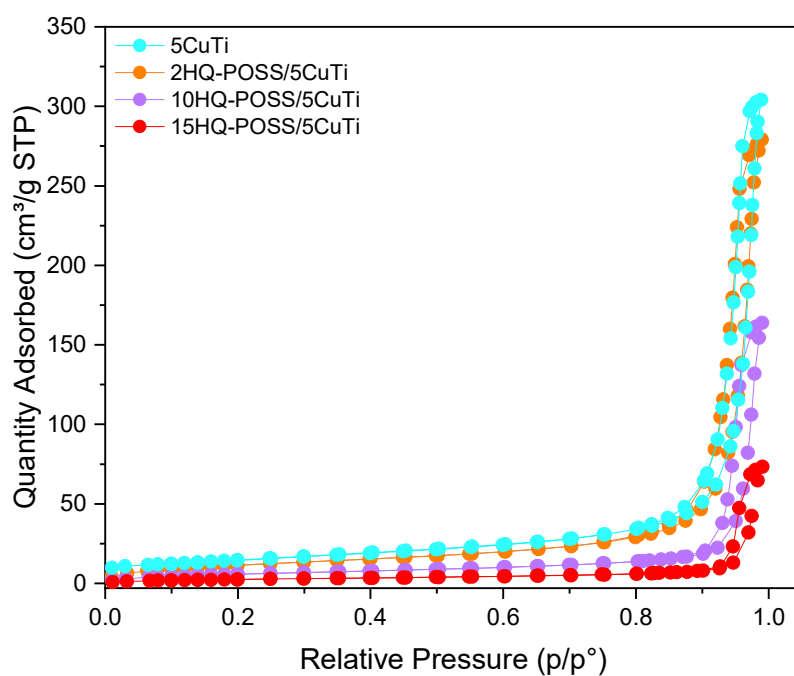

Figure S6. Adsorption-desorption isotherms of samples of HQ-POSS and materials.

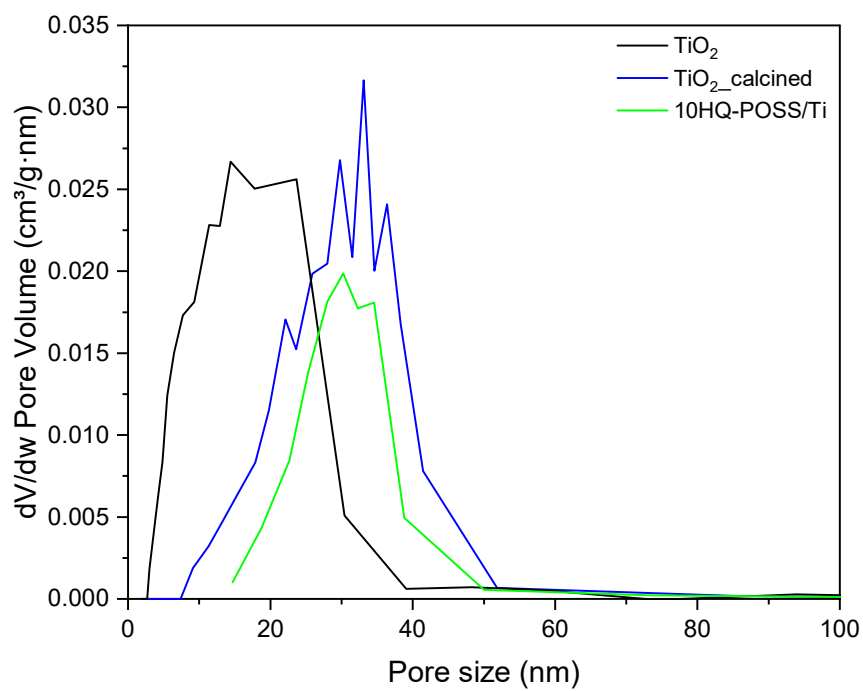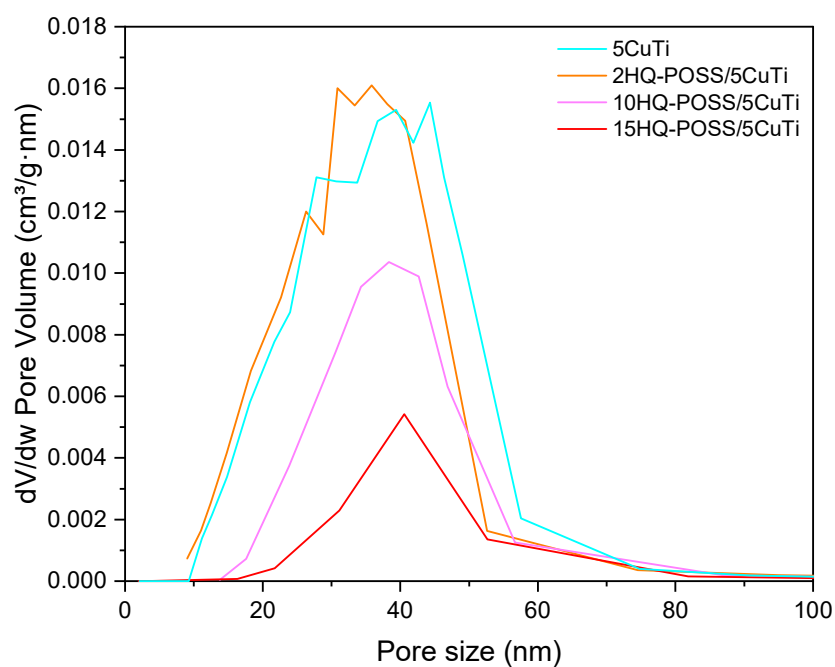

Figure S7. Pore size distribution of samples of HQ-POSS and materials.

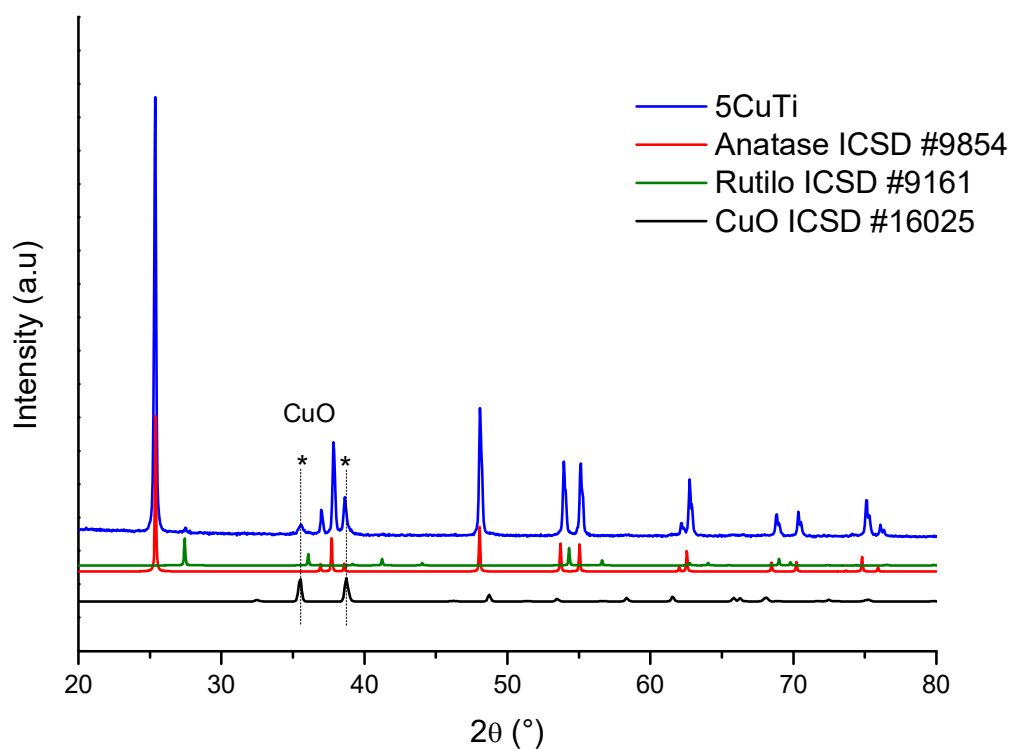

**Figure S8.** XRD patterns of the material 5CuTi and related reference ICSD files.

**Disclaimer/Publisher's Note:** The statements, opinions and data contained in all publications are solely those of the individual author(s) and contributor(s) and not of MDPI and/or the editor(s). MDPI and/or the editor(s) disclaim responsibility for any injury to people or property resulting from any ideas, methods, instructions or products referred to in the content.
